# Supplementary material
Source: Elsevier journal article supplement (https://www.sciencedirect.com/science/article/pii/S000173102030137X)
Supplement: mmc1 [file S000173102030137X:mmc1.pdf]

**ANEXO 1: " CUESTIONARIO DE HÁBITOS, ACTITUDES Y CONOCIMIENTOS RELACIONADOS CON LA EXPOSICIÓN SOLAR " (Cuestionario CHACES versión juvenil, 11-18 años).**

| DATOS DEMOGRÁFICOS      |  |
|-------------------------|--|
| SEXO                    |  |
| HOMBRE                  |  |
| MUJER                   |  |
| EDAD                    |  |
| PAIS DE NACIMIENTO      |  |
| MUNICIPIO DE RESIDENCIA |  |
| NIVEL DE ESTUDIOS       |  |
| Sin estudios            |  |
| Infantil                |  |
| Primaria                |  |
| Secundaria              |  |

| COLOR DE PIEL                          |  |
|----------------------------------------|--|
| ¿Cuál es el color natural de tu piel?: |  |
| Muy clara                              |  |
| Clara                                  |  |
| Intermedia                             |  |
| Morena                                 |  |
| Negra                                  |  |

| FOTOTIPO CUTÁNEO                                                                             |  |
|----------------------------------------------------------------------------------------------|--|
| ¿Cómo reacciona tú piel cuando la expones al sol del mediodía una hora al inicio del verano? |  |
| No me quemo al día siguiente y me bronceo intensamente al cabo de 1 semana                   |  |
| Tengo una quemadura suave al día siguiente y me bronceo moderadamente al cabo de 1 semana    |  |
| Tengo una quemadura dolorosa al día siguiente y me bronceo ligeramente a la semana           |  |
| Tengo una quemadura dolorosa al día siguiente y no me bronceo a al cabo de 1 semana          |  |

| HÁBITOS DE EXPOSICIÓN SOLAR                                                  |                                        |                                                   |
|------------------------------------------------------------------------------|----------------------------------------|---------------------------------------------------|
| ¿Cuántos días al año te expones al sol realizando actividades al aire libre? |                                        |                                                   |
|                                                                              | BAÑOS EN PISCINA ,<br>PLAYA O SOLARIUM | DEPORTE O<br>ACTIVIDADES DE<br>OCIO AL AIRE LIBRE |
| Ningún día                                                                   |                                        |                                                   |
| 1-5 días                                                                     |                                        |                                                   |
| 6-30 días                                                                    |                                        |                                                   |
| 31-90 días                                                                   |                                        |                                                   |
| Más de 90 días                                                               |                                        |                                                   |
| ¿Cuántas horas al día te sueles exponer al sol?                              |                                        |                                                   |
|                                                                              | BAÑOS EN PISCINA O<br>PLAYA            | DEPORTE O<br>ACTIVIDADES DE<br>OCIO AL AIRE LIBRE |
| Ninguna hora                                                                 |                                        |                                                   |
| 1-2 horas                                                                    |                                        |                                                   |
| 3-4 horas                                                                    |                                        |                                                   |
| 5-6 horas                                                                    |                                        |                                                   |
| Más de 6 horas                                                               |                                        |                                                   |

| QUEMADURAS SOLARES                                                               |  |
|----------------------------------------------------------------------------------|--|
| ¿Cuántas veces te has quemado la piel (enrojecimiento y dolor) en el último año? |  |
| Ninguna                                                                          |  |
| 1-2                                                                              |  |
| 3-5                                                                              |  |
| 6-10                                                                             |  |
| Más de 10                                                                        |  |

| PRÁCTICAS DE PROTECCIÓN SOLAR                                                                             |         |               |         |            |       |
|-----------------------------------------------------------------------------------------------------------|---------|---------------|---------|------------|-------|
| Señala con una X, las medidas de protección solar que utilizas cuando realizas actividades al aire libre: |         |               |         |            |       |
|                                                                                                           | Siempre | Habitualmente | A veces | Casi nunca | Nunca |
| Me resguardo a la sombra/ uso sombrilla                                                                   |         |               |         |            |       |
| Uso gafas de sol                                                                                          |         |               |         |            |       |
| Uso sombrero o gorra                                                                                      |         |               |         |            |       |
| Uso camiseta con manga y pantalón largo                                                                   |         |               |         |            |       |
| Evito las horas del mediodía (12.00 a 16.00 horas)                                                        |         |               |         |            |       |
| Uso cremas de protección solar                                                                            |         |               |         |            |       |

| CREMAS DE PROTECCIÓN SOLAR                                                         |  |
|------------------------------------------------------------------------------------|--|
| Cuando utilizas cremas de protección solar, ¿Qué índice de protección solar usar?: |  |
| No lo sé                                                                           |  |
| 2-10                                                                               |  |
| 15-20                                                                              |  |
| 30-50                                                                              |  |
| Más de 50                                                                          |  |

| ACTITUDES                                                             |                |            |             |               |                          |
|-----------------------------------------------------------------------|----------------|------------|-------------|---------------|--------------------------|
| Señala con una X tu grado de acuerdo con las siguientes afirmaciones: |                |            |             |               |                          |
| ENUNCIADOS                                                            | Muy de acuerdo | De acuerdo | Indiferente | En desacuerdo | Totalmente en desacuerdo |
| Me gusta tomar el sol                                                 |                |            |             |               |                          |
| Me gusta estar moreno/a                                               |                |            |             |               |                          |
| Tomar el sol me sienta bien                                           |                |            |             |               |                          |
| No me gusta usar cremas de protección solar                           |                |            |             |               |                          |
| Merece la pena usar cremas de protección solar                        |                |            |             |               |                          |
| A medio día, prefiero estar a la sombra que al sol                    |                |            |             |               |                          |
| Me preocupa quemarme cuando tomo el sol                               |                |            |             |               |                          |
| Me preocupan las manchas y arrugas que me puedan salir por el sol     |                |            |             |               |                          |
| Me preocupa que me pueda salir cáncer de piel por el sol              |                |            |             |               |                          |
| Es fácil protegerse del sol llevando sombrero y ropa que nos cubra    |                |            |             |               |                          |
| Me gusta tomar el sol                                                 |                |            |             |               |                          |
| Me gusta estar moreno/a                                               |                |            |             |               |                          |
| Tomar el sol me sienta bien                                           |                |            |             |               |                          |
| No me gusta usar cremas de protección solar                           |                |            |             |               |                          |

| CONOCIMIENTOS SOBRE LA EXPOSICIÓN SOLAR                                                                    |           |       |
|------------------------------------------------------------------------------------------------------------|-----------|-------|
| Señala marcando con una X si son verdaderas o falsas las siguientes afirmaciones:                          |           |       |
| ENUNCIADOS                                                                                                 | VERDADERO | FALSO |
| El uso de cabinas de rayos UVA antes de los 30 años aumenta el riesgo de melanoma                          |           |       |
| La radiación ultravioleta ocasiona envejecimiento acelerado de la piel y diversas formas de cáncer de piel |           |       |
| Estando en la sombra, no corremos riesgo de sufrir los efectos de la radiación solar                       |           |       |
| Usar cremas fotoprotectoras es la forma más adecuada de protegerse del sol y prevenir el cáncer de piel    |           |       |
| Una vez que la piel se ha puesto morena no es necesario usar cremas de protección solar                    |           |       |
| Los bebés de menos de 1 año no deben exponerse directamente al sol                                         |           |       |
| Es necesario extremar usar medidas de protección solar cuando el índice UVI es superior a 3                |           |       |
| La ropa oscura protege del sol más que la ropa clara                                                       |           |       |
| Es recomendable tomar al menos una hora de sol al día para garantizar unos niveles adecuados de vitamina D |           |       |
| Los niños deben usar cremas de protección solar con un índice igual o mayor a 30                           |           |       |

**ANEXO 2: " CUESTIONARIO DE HÁBITOS, ACTITUDES Y CONOCIMIENTOS RELACIONADOS CON LA EXPOSICIÓN SOLAR " ( Cuestionario CHACES versión adulta, mayores de 18 años).**

| DATOS DEMOGRÁFICOS               |                                  |  |
|----------------------------------|----------------------------------|--|
| SEXO                             |                                  |  |
|                                  | HOMBRE                           |  |
|                                  | MUJER                            |  |
| EDAD                             |                                  |  |
| PAIS DE NACIMIENTO               |                                  |  |
| MUNICIPIO DE RESIDENCIA          |                                  |  |
| NIVEL DE ESTUDIOS                |                                  |  |
|                                  | Sin estudios                     |  |
|                                  | Infantil                         |  |
|                                  | Primaria                         |  |
|                                  | Secundaria                       |  |
| PROFESIÓN:                       |                                  |  |
| ESTADO CIVIL:                    |                                  |  |
|                                  | Soltero/a                        |  |
|                                  | Casado/a o conviviendo en pareja |  |
|                                  | Viudo/a                          |  |
|                                  | Separado/a o divorciado/a        |  |
| ¿TIENE HIJOS MENORES DE 12 AÑOS? |                                  |  |
|                                  | Si                               |  |
|                                  | No                               |  |

| COLOR DE PIEL                          |            |  |
|----------------------------------------|------------|--|
| ¿Cuál es el color natural de tu piel?: |            |  |
|                                        | Muy clara  |  |
|                                        | Clara      |  |
|                                        | Intermedia |  |
|                                        | Morena     |  |
|                                        | Negra      |  |

| FOTOTIPO CUTÁNEO                                                                            |  |  |
|---------------------------------------------------------------------------------------------|--|--|
| ¿Cómo reacciona su piel cuando la expone al sol del mediodía una hora al inicio del verano? |  |  |
| No me quemo al día siguiente y me bronceo intensamente al cabo de 1 semana                  |  |  |
| Tengo una quemadura suave al día siguiente y me bronceo moderadamente al cabo de 1 semana   |  |  |
| Tengo una quemadura dolorosa al día siguiente y me bronceo ligeramente a la semana          |  |  |
| Tengo una quemadura dolorosa al día siguiente y no me bronceo a al cabo de 1 semana         |  |  |

| HÁBITOS DE EXPOSICIÓN SOLAR                                                                 |                                              |                                                   |                          |
|---------------------------------------------------------------------------------------------|----------------------------------------------|---------------------------------------------------|--------------------------|
| ¿Cuántos <u>días al año</u> se expones al sol realizando actividades al aire libre?         |                                              |                                                   |                          |
|                                                                                             | BAÑOS EN<br>PISCINA ,<br>PLAYA O<br>SOLARIUM | DEPORTE O<br>ACTIVIDADES DE<br>OCIO AL AIRE LIBRE | TRABAJO AL<br>AIRE LIBRE |
| Ningún día                                                                                  |                                              |                                                   |                          |
| 1-5 días                                                                                    |                                              |                                                   |                          |
| 6-30 días                                                                                   |                                              |                                                   |                          |
| 31-90 días                                                                                  |                                              |                                                   |                          |
| Más de 90 días                                                                              |                                              |                                                   |                          |
| ¿Cuántas <u>horas al día</u> se sueles exponer al sol realizando actividades al aire libre? |                                              |                                                   |                          |
|                                                                                             | BAÑOS EN<br>PISCINA O<br>PLAYA               | DEPORTE O<br>ACTIVIDADES DE<br>OCIO AL AIRE LIBRE | TRABAJO AL<br>AIRE LIBRE |
| Ninguna hora                                                                                |                                              |                                                   |                          |
| 1-2 horas                                                                                   |                                              |                                                   |                          |
| 3-4 horas                                                                                   |                                              |                                                   |                          |
| 5-6 horas                                                                                   |                                              |                                                   |                          |
| Más de 6 horas                                                                              |                                              |                                                   |                          |

| QUEMADURAS SOLARES                                                              |  |
|---------------------------------------------------------------------------------|--|
| ¿Cuántas veces se ha quemado la piel (enrojecimiento y dolor) en el último año? |  |
| Ninguna                                                                         |  |
| 1-2                                                                             |  |
| 3-5                                                                             |  |
| 6-10                                                                            |  |
| Más de 10                                                                       |  |

| PRÁCTICAS DE PROTECCIÓN SOLAR                                                                           |         |               |         |            |       |
|---------------------------------------------------------------------------------------------------------|---------|---------------|---------|------------|-------|
| Señale con una X, las medidas de protección solar que utiliza cuando realiza actividades al aire libre: |         |               |         |            |       |
|                                                                                                         | Siempre | Habitualmente | A veces | Casi nunca | Nunca |
| Me resguardo a la sombra/ uso sombrilla                                                                 |         |               |         |            |       |
| Uso gafas de sol                                                                                        |         |               |         |            |       |
| Uso sombrero o gorra                                                                                    |         |               |         |            |       |
| Uso camiseta con manga y pantalón largo                                                                 |         |               |         |            |       |
| Evito las horas del mediodía (12.00 a 16.00 horas)                                                      |         |               |         |            |       |
| Uso cremas de protección solar                                                                          |         |               |         |            |       |

| CREMAS DE PROTECCIÓN SOLAR                                                              |  |
|-----------------------------------------------------------------------------------------|--|
| Cuando utiliza cremas de protección solar, ¿Qué índice de protección solar suele usar?: |  |
| No lo sé                                                                                |  |
| 2-10                                                                                    |  |
| 15-20                                                                                   |  |
| 30-50                                                                                   |  |
| Más de 50                                                                               |  |

| ACTITUDES                                                             |                |            |             |               |                          |
|-----------------------------------------------------------------------|----------------|------------|-------------|---------------|--------------------------|
| Señale con una X tu grado de acuerdo con las siguientes afirmaciones: |                |            |             |               |                          |
| ENUNCIADOS                                                            | Muy de acuerdo | De acuerdo | Indiferente | En desacuerdo | Totalmente en desacuerdo |
| Me gusta tomar el sol                                                 |                |            |             |               |                          |
| Me gusta estar moreno/a                                               |                |            |             |               |                          |
| Tomar el sol me sienta bien                                           |                |            |             |               |                          |
| No me gusta usar cremas de protección solar                           |                |            |             |               |                          |
| Merece la pena usar cremas de protección solar                        |                |            |             |               |                          |
| A medio día, prefiero estar a la sombra que al sol                    |                |            |             |               |                          |
| Me preocupa quemarme cuando tomo el sol                               |                |            |             |               |                          |
| Me preocupan las manchas y arrugas que me puedan salir por el sol     |                |            |             |               |                          |
| Me preocupa que me pueda salir cáncer de piel por el sol              |                |            |             |               |                          |
| Es fácil protegerse del sol llevando sombrero y ropa que nos cubra    |                |            |             |               |                          |
| Me gusta tomar el sol                                                 |                |            |             |               |                          |
| Me gusta estar moreno/a                                               |                |            |             |               |                          |
| Tomar el sol me sienta bien                                           |                |            |             |               |                          |
| No me gusta usar cremas de protección solar                           |                |            |             |               |                          |

| CONOCIMIENTOS SOBRE LA EXPOSICIÓN SOLAR                                                                    |           |       |
|------------------------------------------------------------------------------------------------------------|-----------|-------|
| Señale marcando con una X si son verdaderas o falsas las siguientes afirmaciones:                          |           |       |
| ENUNCIADOS                                                                                                 | VERDADERO | FALSO |
| El uso de cabinas de rayos UVA antes de los 30 años aumenta el riesgo de melanoma                          |           |       |
| La radiación ultravioleta ocasiona envejecimiento acelerado de la piel y diversas formas de cáncer de piel |           |       |
| Estando en la sombra, no corremos riesgo de sufrir los efectos de la radiación solar                       |           |       |
| Usar cremas fotoprotectoras es la forma más adecuada de protegerse del sol y prevenir el cáncer de piel    |           |       |
| Una vez que la piel se ha puesto morena no es necesario usar cremas de protección solar                    |           |       |
| Los bebés de menos de 1 año no deben exponerse directamente al sol                                         |           |       |
| Es necesario extremar usar medidas de protección solar cuando el índice UVI es superior a 3                |           |       |
| La ropa oscura protege del sol más que la ropa clara                                                       |           |       |
| Es recomendable tomar al menos una hora de sol al día para garantizar unos niveles adecuados de vitamina D |           |       |
| Los niños deben usar cremas de protección solar con un índice igual o mayor a 30                           |           |       |
